# Supplementary material
Source: PubMed Central journal article supplement (PMC7965604)
Supplement: 3126_table.pdf [file 3126_table.pdf]

**On-line Table: List of suprathreshold clusters<sup>a</sup>**

| Cluster Index  | Voxels | Z-MAX | Z-MAX X (mm) | Z-MAX Y (mm) | Z-MAX Z (mm) | Z-COG X (mm) | Z-COG Y (mm) | Z-COG Z (mm) | Side      | Anatomic Location                                                                                                                                                                                               |
|----------------|--------|-------|--------------|--------------|--------------|--------------|--------------|--------------|-----------|-----------------------------------------------------------------------------------------------------------------------------------------------------------------------------------------------------------------|
| FA: PD > Other |        |       |              |              |              |              |              |              |           |                                                                                                                                                                                                                 |
| 1              | 258    | 0.95  | 39           | -4           | 25           | 37.5         | -4.69        | 31           | Right     | Superior longitudinal fasciculus                                                                                                                                                                                |
| 2              | 178    | 0.95  | 39           | 31           | 11           | 35.6         | 30.6         | 12.9         | Right     | Inferior fronto-occipital fasciculus                                                                                                                                                                            |
| 3              | 74     | 0.95  | 19           | 40           | -2           | 20.1         | 41.2         | 5.12         | Right     | Forceps minor                                                                                                                                                                                                   |
| 4              | 57     | 0.95  | 30           | 43           | -4           | 31.2         | 39.4         | -0.754       | Right     | Inferior fronto-occipital fasciculus                                                                                                                                                                            |
| 5              | 19     | 0.95  | 20           | 40           | 22           | 19.3         | 41.9         | 23.1         | Right     | Forceps minor                                                                                                                                                                                                   |
| 6              | 13     | 0.95  | 29           | 10           | 26           | 29.5         | 7.69         | 27.6         | Right     | Superior longitudinal fasciculus                                                                                                                                                                                |
| 7              | 2      | 0.95  | 20           | 38           | 26           | 20           | 38.5         | 26           | Right     | Forceps minor                                                                                                                                                                                                   |
| 8              | 1      | 0.95  | 42           | -20          | 34           | 42           | -20          | 34           | Right     | Superior longitudinal fasciculus                                                                                                                                                                                |
| RD: Other > PD |        |       |              |              |              |              |              |              |           |                                                                                                                                                                                                                 |
| 1              | 13026  | 0.97  | 19           | 39           | -1           | 1.14         | 20.7         | 12.8         | Bilateral | Corpus callosum                                                                                                                                                                                                 |
|                |        |       |              |              |              |              |              |              | Bilateral | Forceps minor                                                                                                                                                                                                   |
|                |        |       |              |              |              |              |              |              | Bilateral | Superior longitudinal fasciculus                                                                                                                                                                                |
|                |        |       |              |              |              |              |              |              | Bilateral | Inferior longitudinal fasciculus                                                                                                                                                                                |
|                |        |       |              |              |              |              |              |              | Bilateral | Inferior fronto-occipital fasciculus                                                                                                                                                                            |
|                |        |       |              |              |              |              |              |              | Bilateral | Anterior thalamic radiation                                                                                                                                                                                     |
|                |        |       |              |              |              |              |              |              | Bilateral | Uncinate fasciculus                                                                                                                                                                                             |
|                |        |       |              |              |              |              |              |              | Right     | Corticospinal tract                                                                                                                                                                                             |
| MD: Other > PD |        |       |              |              |              |              |              |              |           |                                                                                                                                                                                                                 |
| 1              | 4425   | 0.96  | 15           | 33           | -4           | 24.8         | 24.2         | 15.2         | Right     | Corpus callosum, forceps minor, superior longitudinal fasciculus, inferior longitudinal fasciculus, inferior fronto-occipital fasciculus, corticospinal tract, anterior thalamic radiation, uncinata fasciculus |
| 2              | 1452   | 0.96  | -17          | 38           | 6            | -24.3        | 34.4         | 11.5         | Left      | Corpus callosum, forceps minor, superior longitudinal fasciculus, inferior longitudinal fasciculus, inferior fronto-occipital fasciculus, uncinata fasciculus, anterior thalamic radiation, uncinata fasciculus |
| 3              | 162    | 0.95  | -13          | 36           | -16          | -15.6        | 35.6         | -11.7        | Left      | Forceps minor                                                                                                                                                                                                   |
| 4              | 79     | 0.95  | -15          | 52           | 16           | -15          | 44.6         | 25.6         | Left      | Forceps minor                                                                                                                                                                                                   |
| 5              | 71     | 0.95  | -29          | 27           | -12          | -28.5        | 28           | -9.66        | Left      | Uncinate fasciculus                                                                                                                                                                                             |

**Note:**—Voxels indicates number of voxels per cluster; Z-MAX = maximal statistical value; Z-MAX X,Y,Z = location of maximum voxel in Montreal Neurological Institute space XYZ; Z-COG X,Y,Z = center of gravity of activation cluster in Montreal Neurological Institute space XYZ.

<sup>a</sup> Threshold-free cluster enhancement—corrected at  $P < .05$  for the comparison of PD versus Other. Cluster index, number of suprathreshold voxels in the cluster, maximum  $P$  value, location of maximum  $P$  value per cluster in standardized Montreal Neurological Institute space (X, Y, Z), and center of gravity of the cluster in standardized Montreal Neurological Institute space [X, Y, Z]. Significant threshold-free cluster enhancement—corrected differences were observed for PD versus Other in FA, and for Other versus PD in RD and MD. The inverse comparisons and the analysis on LD yielded no suprathreshold clusters.
